# Supplementary material for: Differential effects of selective and non-selective cyclooxygenase inhibitors on fecal microbiota in adult horses
Source: PLoS One. 2018 Aug 23;13(8):e0202527. doi: 10.1371/journal.pone.0202527 (PMC6107168; doi:10.1371/journal.pone.0202527)
Supplement: S1 Table — (XLSX) [file pone.0202527.s003.xlsx]

## Sheet: Sheet1
	DE OTUs from phenylbutazone-treated horses between days 0 and 10.
	k__Bacteria;p__Bacteroidetes;c__Bacteroidia;o__Bacteroidales;;f__[Paraprevotellaceae];g__;s__
	k__Bacteria;p__Firmicutes;c__Clostridia;o__Clostridiales;;f__Veillonellaceae;g__Anaerovibrio;s__
	k__Bacteria;p__Bacteroidetes;c__Bacteroidia;o__Bacteroidales;;f__;g__;s__
	k__Bacteria;p__Firmicutes;c__Clostridia;o__Clostridiales;;f__;g__;s__
	k__Bacteria;p__Spirochaetes;c__Spirochaetes;o__Spirochaetales;;f__Spirochaetaceae;g__Treponema;s__
	k__Bacteria;p__Bacteroidetes;c__Bacteroidia;o__Bacteroidales;;f__Prevotellaceae;g__Prevotella;s__
	k__Bacteria;p__Bacteroidetes;c__Bacteroidia;o__Bacteroidales;;f__;g__;s__
	k__Bacteria;p__Bacteroidetes;c__Bacteroidia;o__Bacteroidales;;f__p-2534-18B5;g__;s__
	k__Bacteria;p__Firmicutes;c__Clostridia;o__Clostridiales;;f__Ruminococcaceae;g__Ruminococcus;s__
	k__Bacteria;p__Bacteroidetes;c__Bacteroidia;o__Bacteroidales;;f__[Paraprevotellaceae];g__CF231;s__
	k__Bacteria;p__Spirochaetes;c__Spirochaetes;o__Spirochaetales;;f__Spirochaetaceae;g__Treponema;s__
	k__Bacteria;p__Spirochaetes;c__Spirochaetes;o__Spirochaetales;;f__Spirochaetaceae;g__Treponema;s__
	k__Bacteria;p__Firmicutes;c__Clostridia;o__Clostridiales;;f__;g__;s__
	k__Bacteria;p__Firmicutes;c__Clostridia;o__Clostridiales;;f__Clostridiaceae;g__Clostridium;s__
	k__Bacteria;p__Firmicutes;c__Clostridia;o__Clostridiales;;f__Lachnospiraceae;g__;s__
	k__Bacteria;p__Firmicutes;c__Clostridia;o__Clostridiales;;f__Lachnospiraceae;g__;s__
	k__Bacteria;p__Bacteroidetes;c__Bacteroidia;o__Bacteroidales;;f__[Paraprevotellaceae];g__YRC22;s__
	k__Bacteria;p__Firmicutes;c__Clostridia;o__Clostridiales;;f__Lachnospiraceae;g__;s__
	k__Bacteria;p__Spirochaetes;c__Spirochaetes;o__Spirochaetales;;f__Spirochaetaceae;g__Treponema;s__
	k__Bacteria;p__Firmicutes;c__Clostridia;o__Clostridiales;;f__Lachnospiraceae;g__;s__
	k__Bacteria;p__Cyanobacteria;c__4C0d-2;o__YS2;;f__;g__;s__
	k__Bacteria;p__Firmicutes;c__Clostridia;o__Clostridiales;;f__Lachnospiraceae;g__Blautia;s__
	k__Bacteria;p__Firmicutes;c__Clostridia;o__Clostridiales;;f__Lachnospiraceae;g__;s__
	k__Bacteria;p__Firmicutes;c__Clostridia;o__Clostridiales;;f__Lachnospiraceae;g__;s__
	k__Bacteria;p__Firmicutes;c__Clostridia;o__Clostridiales;;f__;g__;s__
	k__Bacteria;p__Firmicutes;c__Clostridia;o__Clostridiales;;f__Lachnospiraceae;g__;s__
	k__Bacteria;p__Firmicutes;c__Clostridia;o__Clostridiales;;f__Lachnospiraceae;g__;s__
	k__Bacteria;p__Firmicutes;c__Clostridia;o__Clostridiales;;f__Lachnospiraceae;g__;s__
	k__Bacteria;p__Firmicutes;c__Clostridia;o__Clostridiales;;f__Lachnospiraceae;g__;s__
	k__Bacteria;p__Firmicutes;c__Clostridia;o__Clostridiales;;f__Ruminococcaceae;g__Ruminococcus;s__
	k__Bacteria;p__Firmicutes;c__Clostridia;o__Clostridiales;;f__Lachnospiraceae;g__Clostridium;s__fimetarium
	k__Bacteria;p__Firmicutes;c__Clostridia;o__Clostridiales;;f__;g__;s__
	k__Bacteria;p__Firmicutes;c__Clostridia;o__Clostridiales;;f__Ruminococcaceae;g__Ruminococcus;s__
	k__Bacteria;p__Firmicutes;c__Clostridia;o__Clostridiales;;f__Lachnospiraceae;g__Pseudobutyrivibrio;s__
	k__Bacteria;p__Firmicutes;c__Clostridia;o__Clostridiales;;f__Lachnospiraceae;g__;s__
	k__Bacteria;p__Firmicutes;c__Clostridia;o__Clostridiales;;f__Lachnospiraceae;g__;s__
	k__Bacteria;p__Firmicutes;c__Clostridia;o__Clostridiales;;f__Lachnospiraceae;g__;s__
	k__Bacteria;p__Firmicutes;c__Clostridia;o__Clostridiales;;f__Veillonellaceae;g__Anaerovibrio;s__
	k__Bacteria;p__Firmicutes;c__Clostridia;o__Clostridiales;;f__Lachnospiraceae;g__Roseburia;s__
	k__Bacteria;p__Firmicutes;c__Clostridia;o__Clostridiales;;f__Lachnospiraceae;g__;s__
	k__Bacteria;p__Firmicutes;c__Clostridia;o__Clostridiales;;f__Lachnospiraceae;g__;s__
	k__Bacteria;p__Firmicutes;c__Clostridia;o__Clostridiales;;f__Veillonellaceae;g__Anaerovibrio;s__
	k__Bacteria;p__Proteobacteria;c__Gammaproteobacteria;o__Aeromonadales;;f__Succinivibrionaceae;g__;s__
	k__Bacteria;p__Spirochaetes;c__Spirochaetes;o__Spirochaetales;;f__Spirochaetaceae;g__Treponema;s__
	k__Bacteria;p__Bacteroidetes;c__Bacteroidia;o__Bacteroidales;;f__;g__;s__
	k__Bacteria;p__Bacteroidetes;c__Bacteroidia;o__Bacteroidales;;f__;g__;s__
	k__Archaea;p__Euryarchaeota;c__Thermoplasmata;o__E2;;f__[Methanomassiliicoccaceae];g__vadinCA11;s__
	k__Bacteria;p__Spirochaetes;c__Spirochaetes;o__Spirochaetales;;f__Spirochaetaceae;g__Treponema;s__
	k__Bacteria;p__Firmicutes;c__Clostridia;o__Clostridiales;;f__Ruminococcaceae;g__;s__
	k__Bacteria;p__Firmicutes;c__Clostridia;o__Clostridiales;;f__;g__;s__
	k__Bacteria;p__Bacteroidetes;c__Bacteroidia;o__Bacteroidales;;f__BS11;g__;s__
	k__Bacteria;p__Firmicutes;c__Clostridia;o__Clostridiales;;f__;g__;s__
	k__Bacteria;p__Firmicutes;c__Erysipelotrichi;o__Erysipelotrichales;;f__Erysipelotrichaceae;g__RFN20;s__
	k__Bacteria;p__Tenericutes;c__Mollicutes;o__RF39;;f__;g__;s__
	k__Bacteria;p__Firmicutes;c__Erysipelotrichi;o__Erysipelotrichales;;f__Erysipelotrichaceae;g__RFN20;s__
	k__Bacteria;p__Firmicutes;c__Clostridia;o__Clostridiales;;f__;g__;s__
	k__Bacteria;p__Firmicutes;c__Clostridia;o__Clostridiales;;f__;g__;s__
	k__Bacteria;p__Firmicutes;c__Clostridia;o__Clostridiales;;f__Veillonellaceae;g__;s__
	k__Bacteria;p__Bacteroidetes;c__Bacteroidia;o__Bacteroidales;;f__;g__;s__
	k__Bacteria;p__Firmicutes;c__Clostridia;o__Clostridiales;;f__Ruminococcaceae;g__;s__
	k__Bacteria;p__Firmicutes;c__Clostridia;o__Clostridiales;;f__;g__;s__
	k__Bacteria;p__Actinobacteria;c__Coriobacteriia;o__Coriobacteriales;;f__Coriobacteriaceae;g__Adlercreutzia;s__
	k__Bacteria;p__Firmicutes;c__Clostridia;o__Clostridiales;;f__Ruminococcaceae;g__;s__
	k__Bacteria;p__Firmicutes;c__Clostridia;o__Clostridiales;;f__Ruminococcaceae;g__;s__
	k__Bacteria;p__Actinobacteria;c__Coriobacteriia;o__Coriobacteriales;;f__Coriobacteriaceae;g__;s__
	k__Bacteria;p__Bacteroidetes;c__Bacteroidia;o__Bacteroidales;;f__;g__;s__
	k__Bacteria;p__Firmicutes;c__Clostridia;o__Clostridiales;;f__Lachnospiraceae;g__;s__
	k__Bacteria;p__Firmicutes;c__Clostridia;o__Clostridiales;;f__Lachnospiraceae;g__;s__
	k__Bacteria;p__Firmicutes;c__Clostridia;o__Clostridiales;;f__Lachnospiraceae;g__;s__
	k__Bacteria;p__Firmicutes;c__Clostridia;o__Clostridiales;;f__;g__;s__
	k__Bacteria;p__Firmicutes;c__Clostridia;o__Clostridiales;;f__Lachnospiraceae;g__;s__
	k__Bacteria;p__Firmicutes;c__Clostridia;o__Clostridiales;;f__;g__;s__
	k__Bacteria;p__Firmicutes;c__Clostridia;o__Clostridiales;;f__Lachnospiraceae;g__Coprococcus;s__
	k__Bacteria;p__Firmicutes;c__Clostridia;o__Clostridiales;;f__Lachnospiraceae;g__;s__
	k__Bacteria;p__Proteobacteria;c__Deltaproteobacteria;o__Desulfovibrionales;;f__Desulfovibrionaceae;g__Desulfovibrio;s__
	k__Bacteria;p__Firmicutes;c__Clostridia;o__Clostridiales;;f__Ruminococcaceae;g__;s__
	k__Bacteria;p__Firmicutes;c__Clostridia;o__Clostridiales;;f__Lachnospiraceae;g__;s__
	k__Bacteria;p__Firmicutes;c__Clostridia;o__Clostridiales;;f__Lachnospiraceae;g__;s__
	k__Bacteria;p__Firmicutes;c__Clostridia;o__Clostridiales;;f__;g__;s__
	k__Bacteria;p__Bacteroidetes;c__Bacteroidia;o__Bacteroidales;;f__;g__;s__
	k__Bacteria;p__Firmicutes;c__Clostridia;o__Clostridiales;;f__Lachnospiraceae;g__;s__
	k__Bacteria;p__Firmicutes;c__Clostridia;o__Clostridiales;;f__Lachnospiraceae;g__;s__
	k__Bacteria;p__Firmicutes;c__Clostridia;o__Clostridiales;;f__Lachnospiraceae;g__Blautia;s__
	k__Bacteria;p__Firmicutes;c__Clostridia;o__Clostridiales;;f__;g__;s__
	k__Bacteria;p__Firmicutes;c__Clostridia;o__Clostridiales;;f__Lachnospiraceae;g__Coprococcus;s__
	k__Bacteria;p__Firmicutes;c__Clostridia;o__Clostridiales;;f__Lachnospiraceae;g__;s__
	k__Bacteria;p__Firmicutes;c__Clostridia;o__Clostridiales;;f__Lachnospiraceae;g__;s__
	k__Bacteria;p__Firmicutes;c__Clostridia;o__Clostridiales;;f__Ruminococcaceae;g__;s__
	k__Bacteria;p__Firmicutes;c__Clostridia;o__Clostridiales;;f__Lachnospiraceae;g__Blautia;s__
	k__Bacteria;p__Spirochaetes;c__Spirochaetes;o__Spirochaetales;;f__Spirochaetaceae;g__Treponema;s__
	k__Bacteria;p__Firmicutes;c__Clostridia;o__Clostridiales;;f__Lachnospiraceae;g__;s__
	k__Bacteria;p__Bacteroidetes;c__Bacteroidia;o__Bacteroidales;;f__;g__;s__
	k__Bacteria;p__Firmicutes;c__Clostridia;o__Clostridiales;;f__Lachnospiraceae;g__;s__
	k__Bacteria;p__Firmicutes;c__Clostridia;o__Clostridiales;;f__Veillonellaceae;g__;s__
	k__Bacteria;p__Bacteroidetes;c__Bacteroidia;o__Bacteroidales;;f__Prevotellaceae;g__Prevotella;s__
	k__Bacteria;p__Firmicutes;c__Erysipelotrichi;o__Erysipelotrichales;;f__Erysipelotrichaceae;g__;s__
	k__Bacteria;p__Firmicutes;c__Clostridia;o__Clostridiales;;f__Ruminococcaceae;g__Ruminococcus;s__
	k__Bacteria;p__Firmicutes;c__Clostridia;o__Clostridiales;;f__Lachnospiraceae;g__;s__
	k__Bacteria;p__Bacteroidetes;c__Bacteroidia;o__Bacteroidales;;f__;g__;s__
	k__Bacteria;p__Proteobacteria;c__Gammaproteobacteria;o__Aeromonadales;;f__Succinivibrionaceae;g__Ruminobacter;s__
	k__Bacteria;p__Spirochaetes;c__Spirochaetes;o__Spirochaetales;;f__Spirochaetaceae;g__Treponema;s__
	k__Bacteria;p__Bacteroidetes;c__Bacteroidia;o__Bacteroidales;;f__[Paraprevotellaceae];g__YRC22;s__
